# Supplementary material for: Ecological Niche Modeling of Aedes and Culex Mosquitoes: A Risk Map for Chikungunya and West Nile Viruses in Zambia
Source: MDPI journal article supplement (doi:10.3390/v15091900), 2023-09-08
Supplement: s1 [file s1]

| species | longitude | latitude |
|---------|-----------|----------|
| Aedes   | 28.31193  | -15.3715 |
| Aedes   | 28.27267  | -15.3595 |
| Aedes   | 27.4791   | -17.2224 |
| Aedes   | 28.46043  | -14.4207 |
| Aedes   | 28.1947   | -15.2319 |
| Aedes   | 31.1103   | -8.7692  |
| Aedes   | 32.3839   | -10.0919 |
| Aedes   | 31.2702   | -10.4841 |
| Aedes   | 32.3839   | -13.3833 |
| Aedes   | 24.2553   | -11.4308 |
| Aedes   | 23.1306   | -15.254  |
| Aedes   | 24.1743   | -17.2757 |
| Aedes   | 25.1632   | -17.4623 |
| Aedes   | 25.4832   | -17.5106 |
| Aedes   | 28.5119   | -16.0141 |
| Aedes   | 29.1316   | -15.1903 |
| Aedes   | 24.4759   | -13.4103 |
| Aedes   | 24.1227   | -13.3548 |
| Aedes   | 22.414    | -13.0513 |
| Aedes   | 24.4749   | -14.4839 |
