# Supplementary material for: Ecological Niche Modeling of Aedes and Culex Mosquitoes: A Risk Map for Chikungunya and West Nile Viruses in Zambia
Source: MDPI journal article supplement (doi:10.3390/v15091900), 2023-09-08
Supplement: s1 [file s1]

|        | bio_1    | bio_2    | bio_3    | bio_4    | bio_5    | bio_6    | bio_7    | bio_8    | bio_9    | bio_10   | bio_11   | bio_12   | bio_13   | bio_14   | bio_15   | bio_16   | bio_17   | bio_18   | bio_19   | elev_1   |
|--------|----------|----------|----------|----------|----------|----------|----------|----------|----------|----------|----------|----------|----------|----------|----------|----------|----------|----------|----------|----------|
| bio_1  | 1        | -0.12056 | 0.166448 | -0.08404 | 0.734349 | 0.713034 | -0.1377  | 0.902399 | 0.854774 | 0.886557 | 0.847543 | -0.20411 | -0.30805 | 0.156766 | -0.05677 | -0.36711 | 0.18117  | -0.15538 | 0.10794  | -0.83187 |
| bio_2  | -0.12056 | 1        | -0.31682 | 0.567237 | 0.436297 | -0.70482 | 0.889836 | 0.055428 | -0.39633 | 0.083639 | -0.39024 | -0.38352 | -0.35218 | -0.25819 | 0.288649 | -0.28511 | -0.334   | -0.20078 | -0.13771 | 0.007848 |
| bio_3  | 0.166448 | -0.31682 | 1        | -0.86675 | -0.3489  | 0.527258 | -0.68079 | -0.10124 | 0.525726 | -0.20896 | 0.565255 | 0.588347 | 0.172674 | 0.153348 | -0.78091 | 0.117645 | 0.452199 | 0.039564 | 0.281083 | 0.111969 |
| bio_4  | -0.08404 | 0.567237 | -0.86675 | 1        | 0.47455  | -0.60651 | 0.83101  | 0.255886 | -0.52002 | 0.32279  | -0.56627 | -0.79345 | -0.41179 | -0.08631 | 0.828294 | -0.36769 | -0.38388 | -0.0454  | -0.23405 | -0.20191 |
| bio_5  | 0.734349 | 0.436297 | -0.3489  | 0.47455  | 1        | 0.139274 | 0.517555 | 0.828035 | 0.393049 | 0.889205 | 0.37223  | -0.54432 | -0.45667 | -0.01181 | 0.374288 | -0.45081 | -0.12895 | -0.27443 | -0.05387 | -0.74827 |
| bio_6  | 0.713034 | -0.70482 | 0.527258 | -0.60651 | 0.139274 | 1        | -0.76339 | 0.487967 | 0.901767 | 0.450618 | 0.896743 | 0.261755 | 0.092486 | 0.305012 | -0.38308 | 0.010926 | 0.428701 | 0.008667 | 0.215693 | -0.49243 |
| bio_7  | -0.1377  | 0.889836 | -0.68079 | 0.83101  | 0.517555 | -0.76339 | 1        | 0.116969 | -0.52183 | 0.188542 | -0.53134 | -0.57837 | -0.37569 | -0.26817 | 0.571972 | -0.30215 | -0.45091 | -0.18418 | -0.21871 | -0.06169 |
| bio_8  | 0.902399 | 0.055428 | -0.10124 | 0.255886 | 0.828035 | 0.487967 | 0.116969 | 1        | 0.644175 | 0.945222 | 0.617086 | -0.47827 | -0.46402 | 0.168823 | 0.203516 | -0.5149  | 0.095286 | -0.06825 | 0.027169 | -0.88812 |
| bio_9  | 0.854774 | -0.39633 | 0.525726 | -0.52002 | 0.393049 | 0.901767 | -0.52183 | 0.644175 | 1        | 0.602585 | 0.974777 | 0.198821 | -0.03168 | 0.273388 | -0.41532 | -0.11207 | 0.410585 | -0.09049 | 0.231307 | -0.62958 |
| bio_10 | 0.886557 | 0.083639 | -0.20896 | 0.32279  | 0.889205 | 0.450618 | 0.188542 | 0.945222 | 0.602585 | 1        | 0.575355 | -0.51754 | -0.43476 | 0.112792 | 0.313801 | -0.4718  | 0.005133 | -0.19671 | 0.004795 | -0.85589 |
| bio_11 | 0.847543 | -0.39024 | 0.565255 | -0.56627 | 0.37223  | 0.896743 | -0.53134 | 0.617086 | 0.974777 | 0.575355 | 1        | 0.219994 | -0.05323 | 0.171143 | -0.45254 | -0.12371 | 0.339906 | -0.11068 | 0.20578  | -0.58656 |
| bio_12 | -0.20411 | -0.38352 | 0.588347 | -0.79345 | -0.54432 | 0.261755 | -0.57837 | -0.47827 | 0.198821 | -0.51754 | 0.219994 | 1        | 0.791403 | 0.150664 | -0.72325 | 0.767713 | 0.40181  | 0.183675 | 0.213925 | 0.331157 |
| bio_13 | -0.30805 | -0.35218 | 0.172674 | -0.41179 | -0.45667 | 0.092486 | -0.37569 | -0.46402 | -0.03168 | -0.43476 | -0.05323 | 0.791403 | 1        | 0.151207 | -0.19162 | 0.970378 | 0.222292 | 0.185812 | 0.11738  | 0.277597 |
| bio_14 | 0.156766 | -0.25819 | 0.153348 | -0.08631 | -0.01181 | 0.305012 | -0.26817 | 0.168823 | 0.273388 | 0.112792 | 0.171143 | 0.150664 | 0.151207 | 1        | -0.20259 | 0.105144 | 0.8758   | 0.245972 | 0.329981 | -0.26453 |
| bio_15 | -0.05677 | 0.288649 | -0.78091 | 0.828294 | 0.374288 | -0.38308 | 0.571972 | 0.203516 | -0.41532 | 0.313801 | -0.45254 | -0.72325 | -0.19162 | -0.20259 | 1        | -0.12916 | -0.51142 | -0.13171 | -0.28321 | -0.17683 |
| bio_16 | -0.36711 | -0.28511 | 0.117645 | -0.36769 | -0.45081 | 0.010926 | -0.30215 | -0.5149  | -0.11207 | -0.4718  | -0.12371 | 0.767713 | 0.970378 | 0.105144 | -0.12916 | 1        | 0.15436  | 0.151821 | 0.070676 | 0.320999 |
| bio_17 | 0.18117  | -0.334   | 0.452199 | -0.38388 | -0.12895 | 0.428701 | -0.45091 | 0.095286 | 0.410585 | 0.005133 | 0.339906 | 0.40181  | 0.222292 | 0.8758   | -0.51142 | 0.15436  | 1        | 0.259054 | 0.414815 | -0.20799 |
| bio_18 | -0.15538 | -0.20078 | 0.039564 | -0.0454  | -0.27443 | 0.008667 | -0.18418 | -0.06825 | -0.09049 | -0.19671 | -0.11068 | 0.183675 | 0.185812 | 0.245972 | -0.13171 | 0.151821 | 0.259054 | 1        | 0.026923 | 0.014337 |
| bio_19 | 0.10794  | -0.13771 | 0.281083 | -0.23405 | -0.05387 | 0.215693 | -0.21871 | 0.027169 | 0.231307 | 0.004795 | 0.20578  | 0.213925 | 0.11738  | 0.329981 | -0.28321 | 0.070676 | 0.414815 | 0.026923 | 1        | -0.08711 |
| elev_1 | -0.83187 | 0.007848 | 0.111969 | -0.20191 | -0.74827 | -0.49243 | -0.06169 | -0.88812 | -0.62958 | -0.85589 | -0.58656 | 0.331157 | 0.277597 | -0.26453 | -0.17683 | 0.320999 | -0.20799 | 0.014337 | -0.08711 | 1        |

| Variable Description                                       | Abbreviation | Unit |
|------------------------------------------------------------|--------------|------|
| Annual Mean Temperature                                    | BIO1         | Oc   |
| Mean Diurnal Range (Mean of monthly (max temp - min temp)) | BIO2         | Oc   |
| Isothermality (BIO2/BIO7) (×100)                           | BIO3         | Oc   |
| Temperature Seasonality (standard deviation ×100)          | BIO4         | Oc   |
| Max Temperature of Warmest Month                           | BIO5         | Oc   |
| Min Temperature of Coldest Month                           | BIO6         | Oc   |
| Temperature Annual Range (BIO5-BIO6)                       | BIO7         | Oc   |
| Mean Temperature of Wettest Quarter                        | BIO8         | Oc   |
| Mean Temperature of Driest Quarter                         | BIO9         | Oc   |
| Mean Temperature of Warmest Quarter                        | BIO10        | Oc   |
| Mean Temperature of Coldest Quarter                        | BIO11        | Oc   |
| Annual Precipitation                                       | BIO12        | Mm   |
| Precipitation of Wettest Month                             | BIO13        | Mm   |
| Precipitation of Driest Month                              | BIO14        | Mm   |
| Precipitation Seasonality (Coefficient of Variation)       | BIO15        | Mm   |
| Precipitation of Wettest Quarter                           | BIO16        | Mm   |
| Precipitation of Driest Quarter                            | BIO17        | Mm   |
| Precipitation of Warmest Quarter                           | BIO18        | Mm   |
| Precipitation of Coldest Quarter                           | BIO19        | Mm   |
