# Supplementary material for: Ecological Niche Modeling of Aedes and Culex Mosquitoes: A Risk Map for Chikungunya and West Nile Viruses in Zambia
Source: MDPI journal article supplement (doi:10.3390/v15091900), 2023-09-08
Supplement: s1 [file s1]

| species | longitude | latitude |
|---------|-----------|----------|
| Culex   | 28.29819  | -15.3815 |
| Culex   | 28.2932   | -15.3759 |
| Culex   | 28.31437  | -15.3687 |
| Culex   | 28.31193  | -15.3715 |
| Culex   | 28.30455  | -15.3764 |
| Culex   | 28.29384  | -15.3763 |
| Culex   | 27.4791   | -17.2224 |
| Culex   | 28.28     | -15.4589 |
| Culex   | 28.27267  | -15.3595 |
| Culex   | 28.27573  | -15.4579 |
| Culex   | 28.27914  | -15.4594 |
| Culex   | 28.29738  | -15.3751 |
| Culex   | 28.46043  | -14.4207 |
| Culex   | 28.1428   | -15.232  |
| Culex   | 28.1808   | -15.2042 |
| Culex   | 28.1948   | -15.2418 |
| Culex   | 28.2217   | -15.2127 |
| Culex   | 28.0624   | -15.3024 |
| Culex   | 31.1103   | -8.7692  |
| Culex   | 32.3839   | -10.0919 |
| Culex   | 31.2702   | -10.4841 |
| Culex   | 32.3839   | -13.3833 |
| Culex   | 27.5141   | -12.3251 |
| Culex   | 28.1257   | -12.4947 |
| Culex   | 24.1873   | -11.608  |
| Culex   | 23.1306   | -15.264  |
| Culex   | 24.1743   | -17.2757 |
| Culex   | 25.1632   | -17.4623 |
| Culex   | 25.4832   | -17.1506 |
| Culex   | 28.5119   | -16.0141 |
| Culex   | 29.1316   | -15.1903 |
| Culex   | 26.2551   | -15.445  |
| Culex   | 27.4452   | -15.5135 |
| Culex   | 28.4321   | -16.3213 |
| Culex   | 22.4035   | -14.593  |
